# Supplementary material for: A hierarchical Co3O4/CoS microbox heterostructure as a highly efficient bifunctional electrocatalyst for rechargeable Zn–air batteries
Source: Royal Society of Chemistry journal article supplement (doi:10.1039/d1ta01912k), 2021-01-01
Supplement: d1ta01912k1.pdf [file d1ta01912k1.pdf]

## Supporting Information

### **Hierarchical Co<sub>3</sub>O<sub>4</sub>/CoS microbox heterostructure as highly efficient bifunctional electrocatalyst for rechargeable Zn–air batteries**

Kyeongseok Min,<sup>‡a</sup> Sangjin Kim,<sup>‡a</sup> Eoyoon Lee,<sup>a</sup> Geunsang Yoo,<sup>a</sup> Hyung Chul Ham,<sup>a</sup> Sang Eun Shim,<sup>a</sup> Dongwook Lim,<sup>\*a</sup> and Sung-Hyeon Baeck<sup>\*a</sup>

Department of Chemistry and Chemical Engineering, Education and Research Center for Smart Energy Materials and Process, Inha University, Incheon 22212, Republic of Korea

<sup>‡</sup> These authors contributed equally to this work.

*\*Corresponding author*

E-mail address: [dwl@inha.ac.kr](mailto:dwl@inha.ac.kr), [shbaeck@inha.ac.kr](mailto:shbaeck@inha.ac.kr)

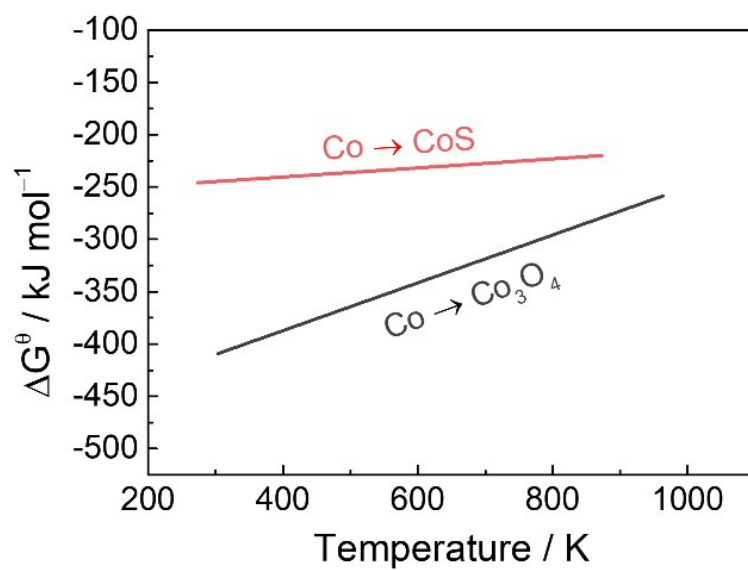

**Fig. S1** The Gibbs free energy of formation ( $\Delta G$ ) of the Co based oxide and sulfide based on the Ellingham diagram.

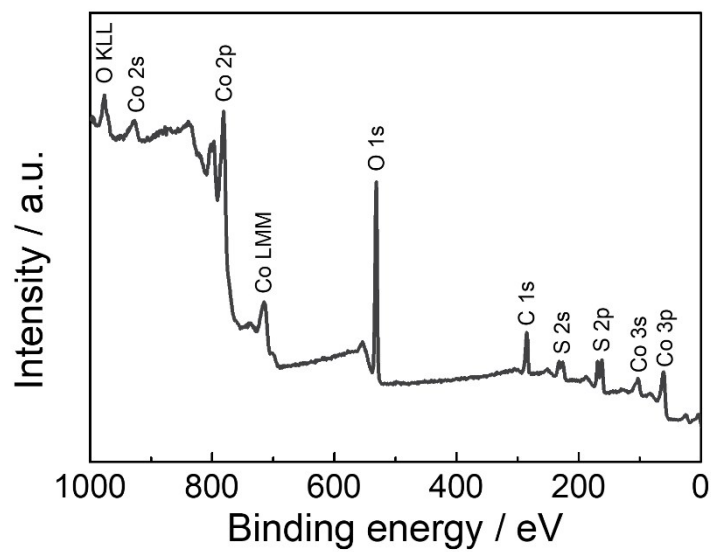

**Fig. S2** The XPS survey spectrum  $\text{Co}_3\text{O}_4/\text{CoS}$  catalyst.

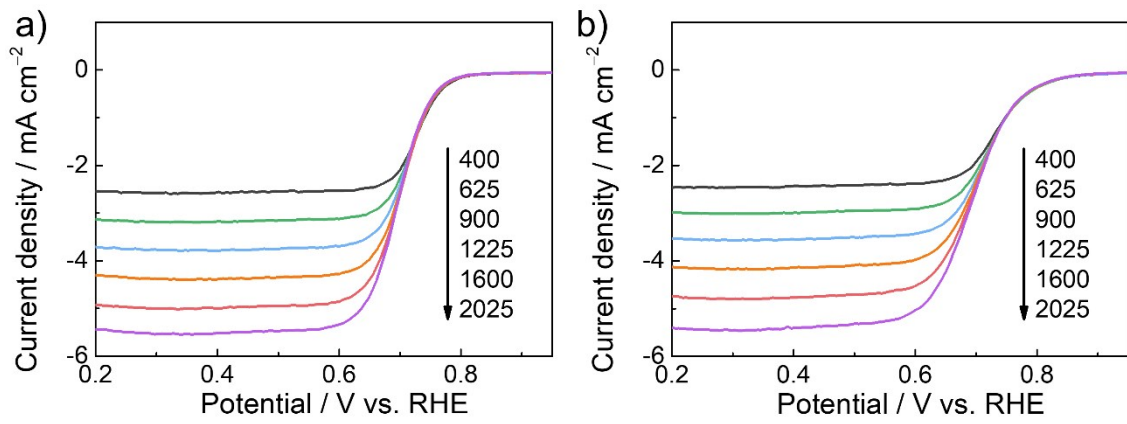

**Fig. S3** Rotating disk voltammograms of (a) Co-Co PBA and (b) Co<sub>3</sub>O<sub>4</sub> at rotation speeds from 400 to 2025 rpm.

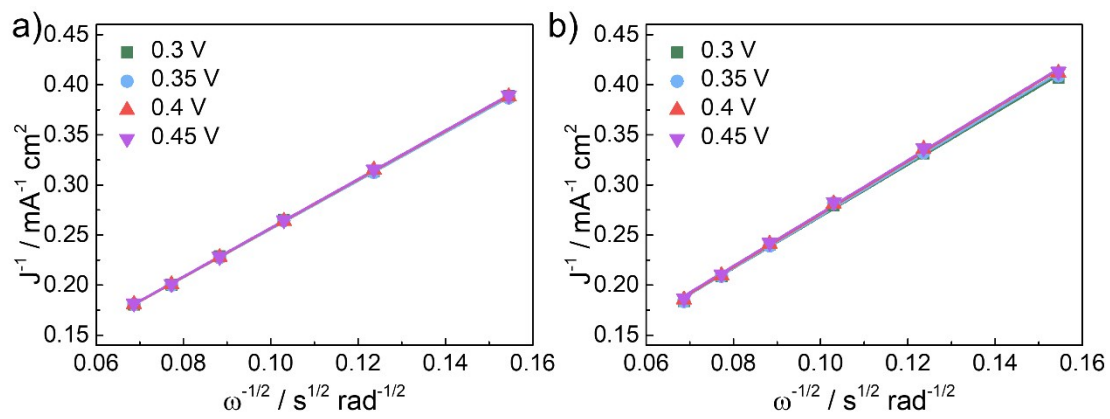

**Fig. S4** The Koutecky–Levich plots of (a) Co-Co PBA and (b)  $\text{Co}_3\text{O}_4$  at different potentials.

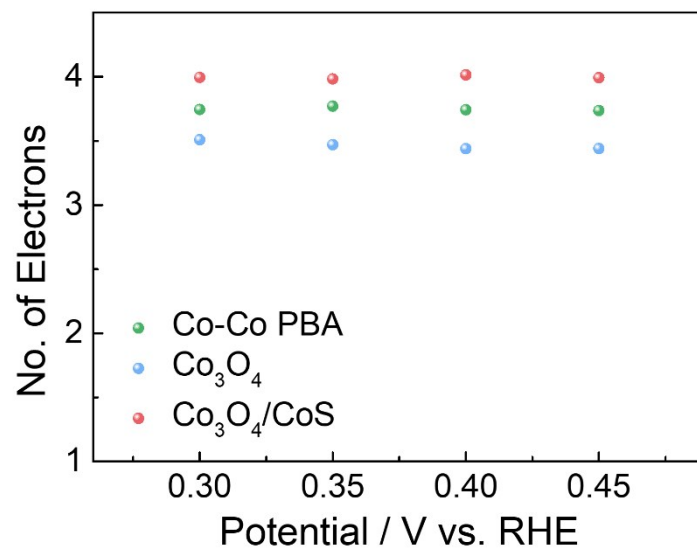

**Fig. S5** Electron transfer number of catalysts as a function of applied voltage.

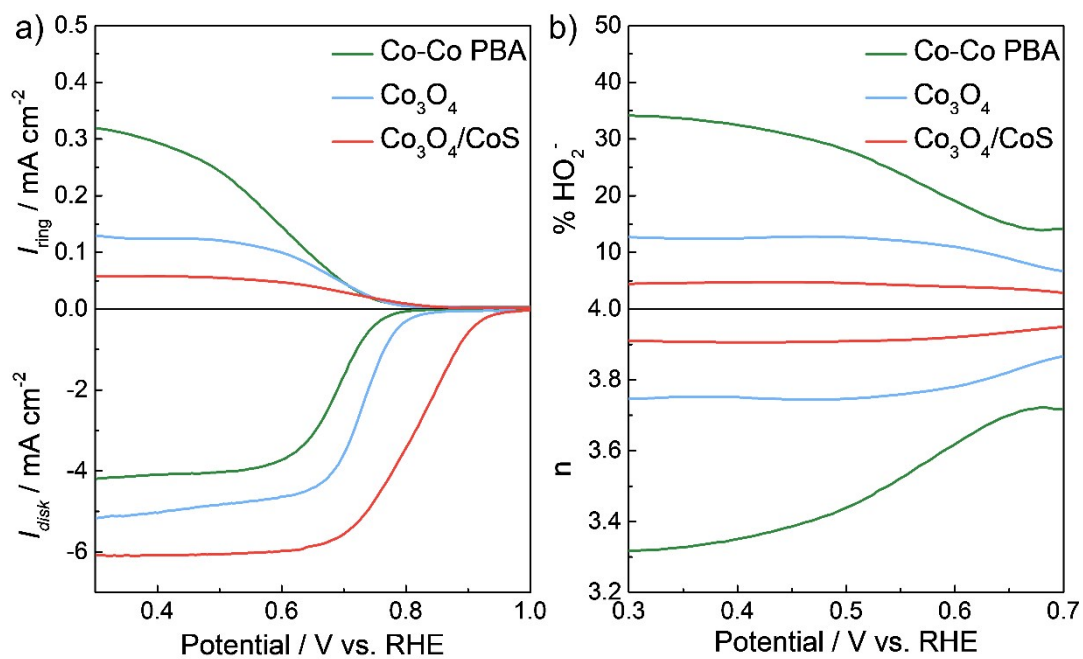

**Fig. S6** (a) RRDE ring current and disk current and (b) HO<sub>2</sub><sup>-</sup> yields and  $n$  values of Co-Co PBA, Co<sub>3</sub>O<sub>4</sub>, and Co<sub>3</sub>O<sub>4</sub>/CoS in O<sub>2</sub>-saturated 0.1 M KOH at 1600 rpm and sweep rate of 5 mV s<sup>-1</sup>.

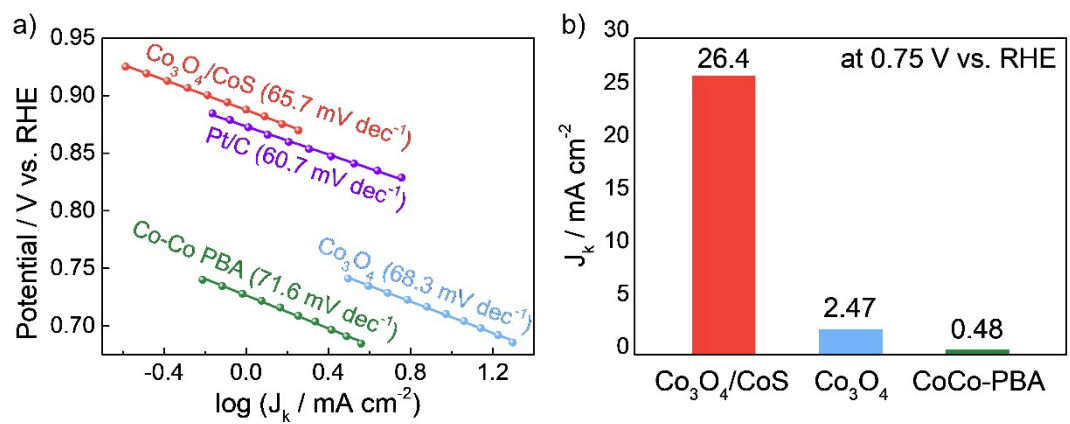

**Fig. S7** (a) Tafel plots and (b) kinetic current densities of prepared samples.



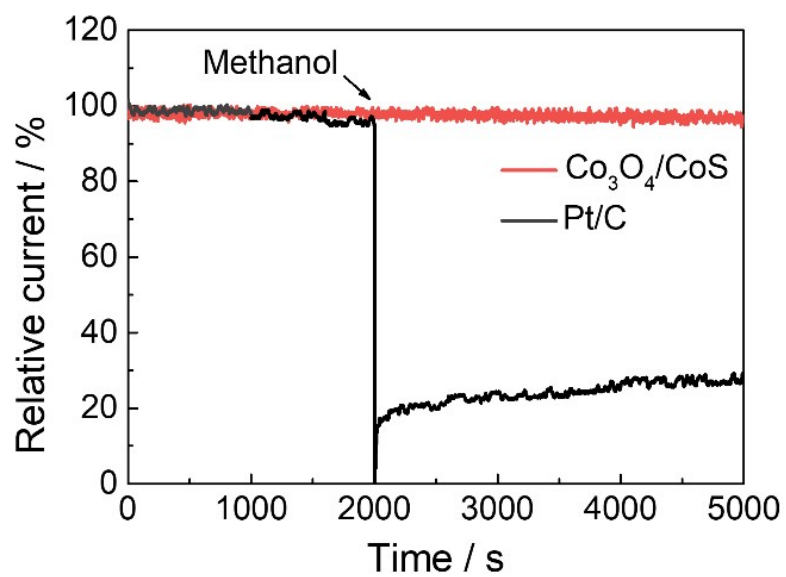

**Fig. S8** Methanol-crossover tests performed by adding methanol into the electrolyte at 2000 s.

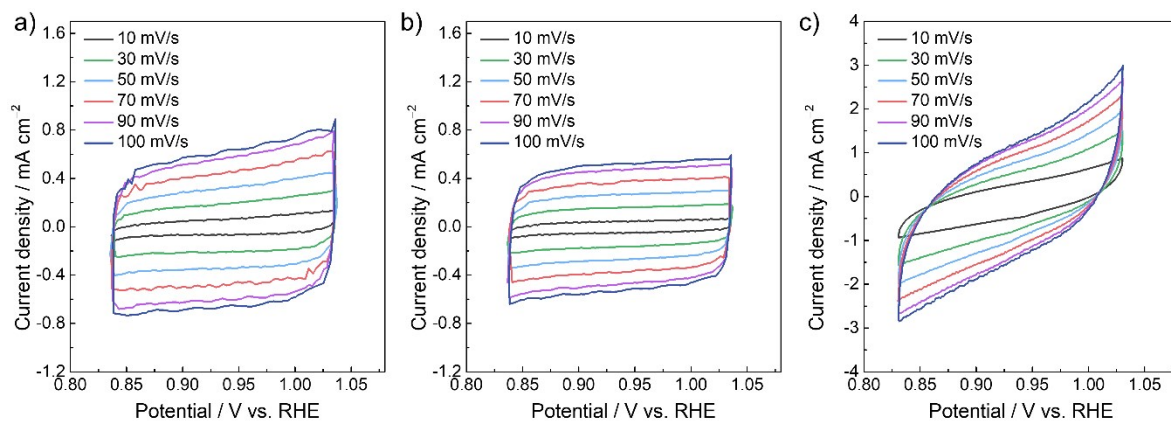

**Fig. S9** Typical cyclic voltammograms at different scan rates of the (a) Co-Co PBA, (b) Co<sub>3</sub>O<sub>4</sub>, and (c) Co<sub>3</sub>O<sub>4</sub>/CoS samples.

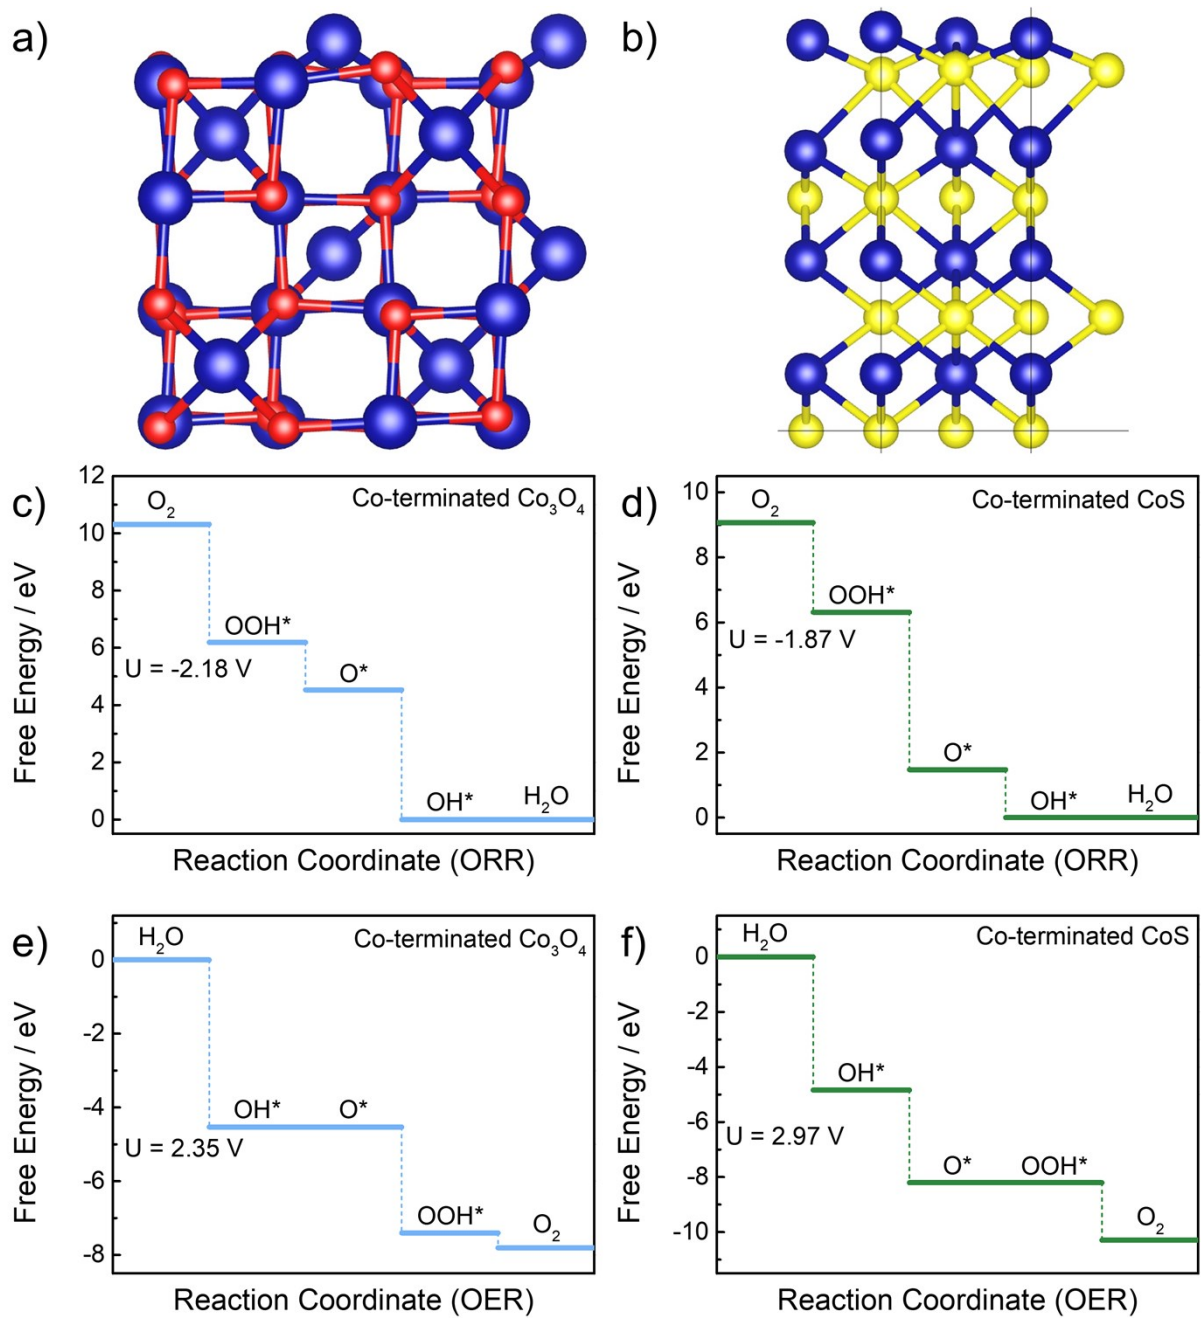

**Fig. S10** Structure of (a) Co-terminated  $\text{Co}_3\text{O}_4$  and (b) Co-terminated CoS. Free energy change diagrams ( $U$  = onset potential) of (c), (e) Co-terminated  $\text{Co}_3\text{O}_4$  (ORR/OER), (d), (f) Co-terminated CoS (ORR/OER) in alkaline condition.

**Table S1** Comparison of the ORR and OER performance of Co<sub>3</sub>O<sub>4</sub>/CoS against previously reported bifunctional catalysts in 0.1 M KOH solution

| Catalysts                                                           | $E_{j=10}$ (V) | $E_{1/2}$ (V) | $\Delta E$ (V) | Reference                                                           |
|---------------------------------------------------------------------|----------------|---------------|----------------|---------------------------------------------------------------------|
| Co <sub>3</sub> O <sub>4</sub> /CoS                                 | 1.579          | 0.820         | 0.759          | This work                                                           |
| Co <sub>3</sub> O <sub>4</sub>                                      | 1.710          | 0.727         | 0.983          | This work                                                           |
| Co-Co PBA                                                           | 1.648          | 0.688         | 0.960          | This work                                                           |
| Pt/C + RuO <sub>2</sub>                                             | 1.596          | 0.827         | 0.769          | This work                                                           |
| Co <sub>3</sub> O <sub>4</sub> /NPGC                                | 1.680          | 0.842         | 0.838          | <i>Angew. Chem. Int. Ed.</i> , 2016, <b>55</b> , 4977-4982.         |
| CoO@Co <sub>3</sub> O <sub>4</sub> /NSG-650                         | 1.690          | 0.790         | 0.900          | <i>ACS Appl. Mater. Interfaces</i> , 2018, <b>10</b> , 7180-7190.   |
| Co <sub>3</sub> O <sub>4</sub> /CNF                                 | 1.646          | 0.851         | 0.795          | <i>J. Energy Storage</i> , 2019, <b>23</b> , 269-277.               |
| Co <sub>3</sub> O <sub>4</sub> -T500                                | 1.610          | 0.650         | 0.960          | <i>Electrochim. Acta</i> , 2021, <b>367</b> , 137490.               |
| Co-Co <sub>3</sub> O <sub>4</sub> @NAC                              | 1.610          | 0.795         | 0.815          | <i>Appl. Catal. B Environ.</i> , 2020, <b>260</b> , 118188.         |
| CoS <sub>2</sub> (400)/N,S-GO                                       | 1.610          | 0.790         | 0.820          | <i>ACS catal.</i> , 2015, <b>5</b> , 3625-3637.                     |
| Ni <sub>x</sub> -Co <sub>9</sub> S <sub>8</sub> @HCF-t              | 1.544          | 0.860         | 0.684          | <i>ACS Appl. Mater. Interfaces</i> , 2021, <b>13</b> , 18683-18692. |
| Co <sub>0.5</sub> Fe <sub>0.5</sub> S@N-MC                          | 1.640          | 0.808         | 0.832          | <i>ACS Appl. Mater. Interfaces</i> , 2015, <b>7</b> , 1207-1218.    |
| Co <sub>3</sub> O <sub>4</sub> /2.7Co <sub>2</sub> MnO <sub>4</sub> | 1.770          | 0.680         | 1.090          | <i>Nanoscale</i> , 2013, <b>5</b> , 5312-5315.                      |
| Co <sub>3</sub> FeS <sub>1.5</sub> (OH) <sub>6</sub>                | 1.588          | 0.721         | 0.867          | <i>Adv. Mater.</i> , 2017, <b>29</b> , 1702327.                     |
| FeN <sub>x</sub> -embedded PNC                                      | 1.625          | 0.860         | 0.775          | <i>ACS nano</i> , 2018, <b>12</b> , 1949-1958.                      |

**Table S2** Binding energy ( $\Delta E_{ad}$ ) of the reaction intermediates by DFT calculation

| Catalysts                                    | $\Delta E_{ad}(\text{O})$ (eV) | $\Delta E_{ad}(\text{OH})$ (eV) | $\Delta E_{ad}(\text{OOH})$ (eV) |
|----------------------------------------------|--------------------------------|---------------------------------|----------------------------------|
| Co <sub>3</sub> O <sub>4</sub> /CoS          | -3.59                          | -2.51                           | -2.02                            |
| O-terminated Co <sub>3</sub> O <sub>4</sub>  | -3.04                          | -2.20                           | -1.19                            |
| Co-terminated Co <sub>3</sub> O <sub>4</sub> | -4.22                          | -5.16                           | -3.54                            |
| S-terminated CoS                             | -4.40                          | -2.27                           | -0.86                            |
| Co-terminated CoS                            | -6.65                          | -4.84                           | -2.48                            |

**Table S3** Comparison of the performances of Zn-air batteries with various electrocatalysts

| Catalysts                                | Current density (mA cm <sup>-2</sup> ) | Power density (mW cm <sup>-2</sup> ) | Specific capacity (mAh g <sub>Zn</sub> <sup>-1</sup> ) | Energy density (Wh kg <sub>Zn</sub> <sup>-1</sup> ) | Reference                                                   |
|------------------------------------------|----------------------------------------|--------------------------------------|--------------------------------------------------------|-----------------------------------------------------|-------------------------------------------------------------|
| Co <sub>3</sub> O <sub>4</sub> /CoS      | 119                                    | 168                                  | 715                                                    | 840                                                 | This work                                                   |
| Pt/C + RuO <sub>2</sub>                  | 80                                     | 137                                  | 690                                                    | 786                                                 | This work                                                   |
| FeNC-S-Fe <sub>x</sub> C/Fe              | -                                      | 149.4                                | 663                                                    | 795                                                 | <i>Adv. Mater.</i> , 2018, <b>30</b> , 1804504.             |
| NCNF                                     | -                                      | -                                    | 626                                                    | 776                                                 | <i>Adv. Mater.</i> , 2016, <b>28</b> , 3000-3006.           |
| NCNT/CoO-NiO-NiCo                        | -                                      | -                                    | 594                                                    | 713                                                 | <i>Angew. Chem. Int. Ed.</i> , 2015, <b>54</b> , 9654-9658. |
| NCNT/Co <sub>x</sub> Mn <sub>1-x</sub> O | -                                      | -                                    | 581                                                    | 695                                                 | <i>Nano Energy</i> , 2016, <b>20</b> , 315-325.             |
| CoZn-NC-700                              | -                                      | 152                                  | 578                                                    | 694                                                 | <i>Adv. Funct. Mater.</i> , 2017, <b>27</b> , 1700795.      |
| AgCu-10                                  | -                                      | 85.8                                 | 572                                                    | 641                                                 | <i>Electrochim. Acta</i> , 2015, <b>158</b> , 437-445.      |
| NiCo <sub>2</sub> S <sub>4</sub> /N-CNT  | 107                                    | 147                                  | 431.1                                                  | 554.6                                               | <i>Nano Energy</i> , 2017, <b>31</b> , 541-550.             |
| ZnCo <sub>2</sub> O <sub>4</sub> /N-CNT  | -                                      | 82.3                                 | 428                                                    | 595                                                 | <i>Adv. Mater.</i> , 2016, <b>28</b> , 3777-3784.           |
